# Supplementary material for: Herpesvirus Infections in KIR2DL2-Positive Multiple Sclerosis Patients: Mechanisms Triggering Autoimmunity
Source: MDPI journal article supplement (doi:10.3390/microorganisms10030494), 2022-02-23
Supplement: s1 [file s1]

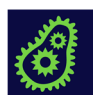

**Supplementary Table S1.**

**(a) Demographic and clinical characteristics of MS patients.**

|                                                          |                |
|----------------------------------------------------------|----------------|
| <b>Female, n (%)</b>                                     | <b>52 (52)</b> |
| Age (years), mean (SD)                                   | 39 (10)        |
| EDSS score, mean (SD)                                    | 2.0 (4.0)      |
| Clinical activity (%)                                    | 40             |
| MRI activity (%)                                         | 35             |
| Frequent herpesvirus reactivations (%)                   | 0 (%)          |
| Neurological manifestation during HHVs primary infection | 0 (%)          |

**(b) Demographic and clinical characteristics of SLE patients with neuropsychiatric involvement.**

|                                                          |                |
|----------------------------------------------------------|----------------|
| <b>Female, n (%)</b>                                     | <b>54 (54)</b> |
| Age (years), mean (SD)                                   | 37 (12)        |
| NP, n (%)                                                |                |
| Cerebrovascular disease                                  | 15 (37.5)      |
| Seizure disorder                                         | 7 (17.5)       |
| Headache                                                 | 6 (14)         |
| Peripheral neuropathy                                    | 4 (10)         |
| Cognitive disorder                                       | 2 (5)          |
| Mood disorder                                            | 1 (2.5)        |
| Transverse myelitis                                      | 1 (2.5)        |
| MS-like syndrome                                         | 1 (2.5)        |
| Chorea                                                   | 1 (2.5)        |
| Acute confusional state                                  | 1 (2.5)        |
| Aseptic meningitis                                       | 1 (2.5)        |
| SLEDAI total score, mean (SD)                            | 3.1 (3.5)      |
| SLICC/ACR score (SDI)                                    | 1.3 (1.2)      |
| NP score, mean (SD)                                      | 6.9 (1.4)      |
| Frequent herpesvirus reactivations (%)                   | 0 (%)          |
| Neurological manifestation during HHVs primary infection | 0 (%)          |

**(c) Clinical hematology results.** Data are reported as Median values.

| Analyte                  | Result<br>CNTR            | Result<br>MS patients     | Result<br>SLE patients    |
|--------------------------|---------------------------|---------------------------|---------------------------|
| White blood cells, total | 5.60x10 <sup>3</sup> /μl  | 5.61x10 <sup>3</sup> / μl | 5.41x10 <sup>3</sup> / μl |
| RBC                      | 4.60x10 <sup>6</sup> / μl | 4.62x10 <sup>3</sup> / μl | 4.52x10 <sup>6</sup> / μl |
| Neutrophils              | 41.00%                    | 41.30%                    | 40.86%                    |
| Lymphocytes              | 44.70%                    | 44.66%                    | 44.12%                    |
| Monocytes                | 8.60%                     | 8.63%                     | 8.56%                     |
| Eosinophils              | 4.50%                     | 4.48%                     | 4.62%                     |
| Basophils                | 1.20%                     | 1.19%                     | 1.21%                     |

**Table S2.** Real time PCR primers for HHVs genome quantitation.

| HHVs      | Microbe Detection Array* |
|-----------|--------------------------|
| EBV       | Vi06439675_s1            |
| HHV-6A/6B | Vi06439627_s1            |

|       |               |
|-------|---------------|
| VZV   | Vi06439647_s1 |
| HSV-1 | Vi04230116_s1 |

\*Applied Biosystems Real Time Array.

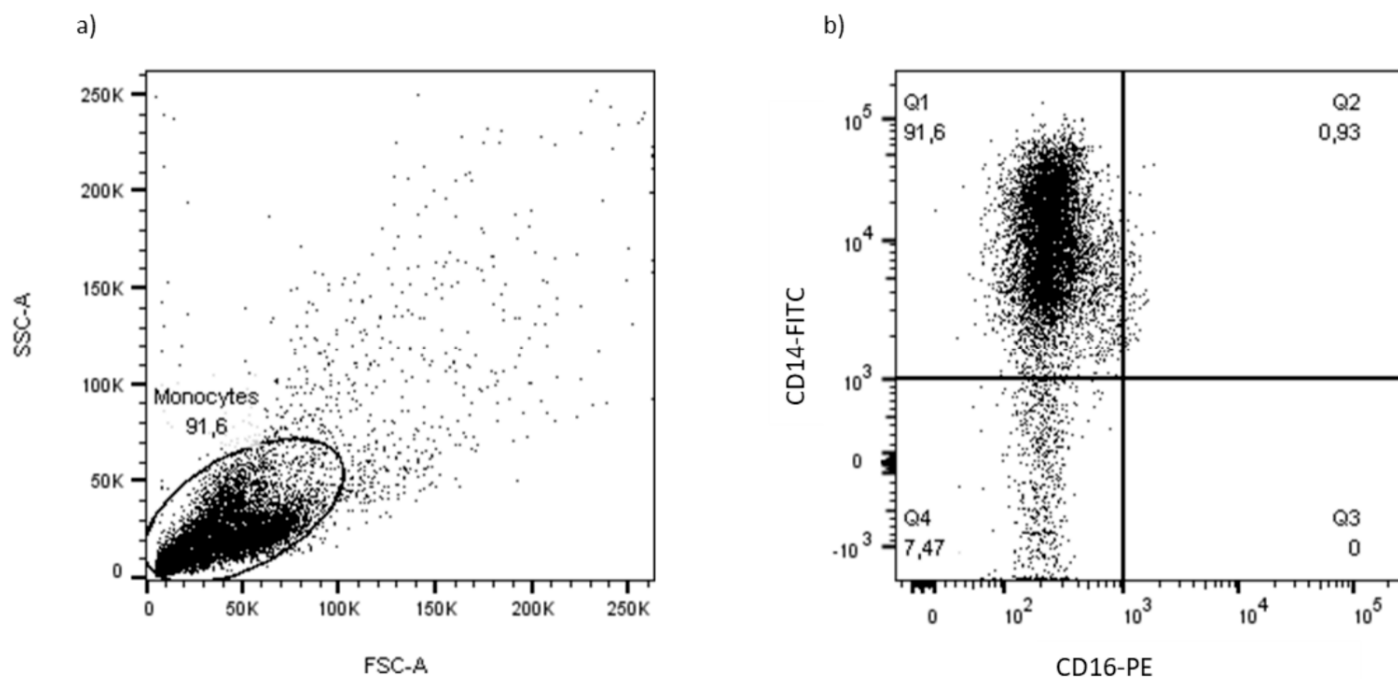

**Figure S1.** Representative staining of monocyte cells obtained from peripheral blood to produce microglia cells. (a) FSC/SSC gating; (b) Monocytes were stained as CD14+CD16- cells.
